# Supplementary material for: Epigallocatechin gallate protects mice from Salmonella enterica ser. Typhimurium infection by modulating bacterial virulence through quorum sensing inhibition
Source: Front Cell Infect Microbiol. 2024 Oct 16;14:1432111. doi: 10.3389/fcimb.2024.1432111 (PMC11521958; doi:10.3389/fcimb.2024.1432111)

Supplementary file

Table S1 Primers of genes

| Target name | Type | Primer sequence |
| --- | --- | --- |
| LuxS | Fw | GCGACCACCTCAACGGTAACG |
| Rev | ACTTTCAGCACATCCGCCATCG |
| FilZ | Fw | CTTTAAACACAGCCAGACGCATTGC |
| Rev | CGATCTTGCCACGGCGAACC |
| sdiA | Fw | AGGAGATGGCGGCAGCAGAG |
| Rev | GGACGGGATGACGAACACACAG |
| srgC | Fw | GCATATCAGTGCGGGTACAGTAGTG |
| Rev | TTCCGTCAGGCTTGCATCTTGAAG |
| pdfI | Fw | ACTCAGTATCTACCAGGTCCGCTTG |
| Rev | ACTCCCTTTCCGGCATTCACTTTC |
| fimI | Fw | TAGCGGGGCTTGTTTTGATGTCG |
| Rev | CAGTTGTCCGCGCAGGTGAAC |
| fimD | Fw | AAACGCCCGTACCTGGACAAAC |
| Rev | CCATCCTGCCGCTGCTGTTG |
| fimH | Fw | GGCGGGGACAACGGTGAATTATAC |
| Rev | CCAGCGACACTATCGGTGATGC |
| fimZ | Fw | GGCACCGACGGCTTTACCTTAC |
| Rev | CGCCCGCTCTTATTGCTCTTCC |
| fimY | Fw | GTACCACGCAGGGAAAGACACC |
| Rev | CGGCAAGGCATAATTGAGCTGTTG |
| FlgM | Fw | ACCTTTGAAACCCGTTAGCACTGTC |
| Rev | CTGACGCCTGGCTGCATGAG |
| FlhD | Fw | GATCACCCGTTTGACTCAGGATTCG |
| Rev | CGCCGTATCGTCCACTTCATTGAG |
| FliA | Fw | TGTTGCGGAGTATCGTCAGATGTTG |
| Rev | CGCCCTCCAGCAGTTGATGTAAC |
| csgA | Fw | CAGCATTCGCAGCAATCGTAGTTTC |
| Rev | GCCGCCGCCGTTATGATTACC |
| csgB | Fw | TTGGTCAAGTCGGCACGGATAATAG |
| Rev | TCGCCCGATTATTTCCTCCTTCTTG |
| csgD | Fw | AATGCGGACTCGGTGCTGTTG |
| Rev | GTGGTCAGCGGATTACAGGGTATTC |
| csgE | Fw | GGTGTATTCGCTTTCCCATTTGTCG |
| Rev | CAGCAGAGTTACTGTTCGCTACCG |
| csgG | Fw | GCCTGTCCGCTTTATTCTGCAAATC |
| Rev | CTGGAAGGCGAAATCGGCTATACC |
| HilA | Fw | AGAACATGCGATTAAGGCGACAGAG |
| Rev | AGCAAACTCCCGACGATGTATTCTG |
| HilC | Fw | AAGCCCGGTGGGTTTGATTTCC |
| Rev | ACCTCAGCCTGTGACCATTTGC |
| HilE | Fw | TGGACGGTATTGAAGGCGAAAGC |
| Rev | GTTTTGTCGGGTTGTGGTTGTAAGC |
| HilD | Fw | TAACGTGACGCTTGAAGAGG |
| Rev | GGTAcCGCCATTTTGGTTTG |
| SlyA | Fw | CTAGGTTCTGATCTGGCACGGTTG |
| Rev | ACCCAATGTGTCTGCGTCAATTCC |
| SsrA | Fw | TTGCCGCAGAATACCAACTTTTACG |
| Rev | CAATATCAGCCAGCAAGAGGTCCAG |
| SsrB | Fw | CAGCAAGTTCTGTTAGCGGCATTG |
| Rev | AGCAGTTGATGATTGGTCGTGTCAG |

Fig S1 The gene expression of virulence


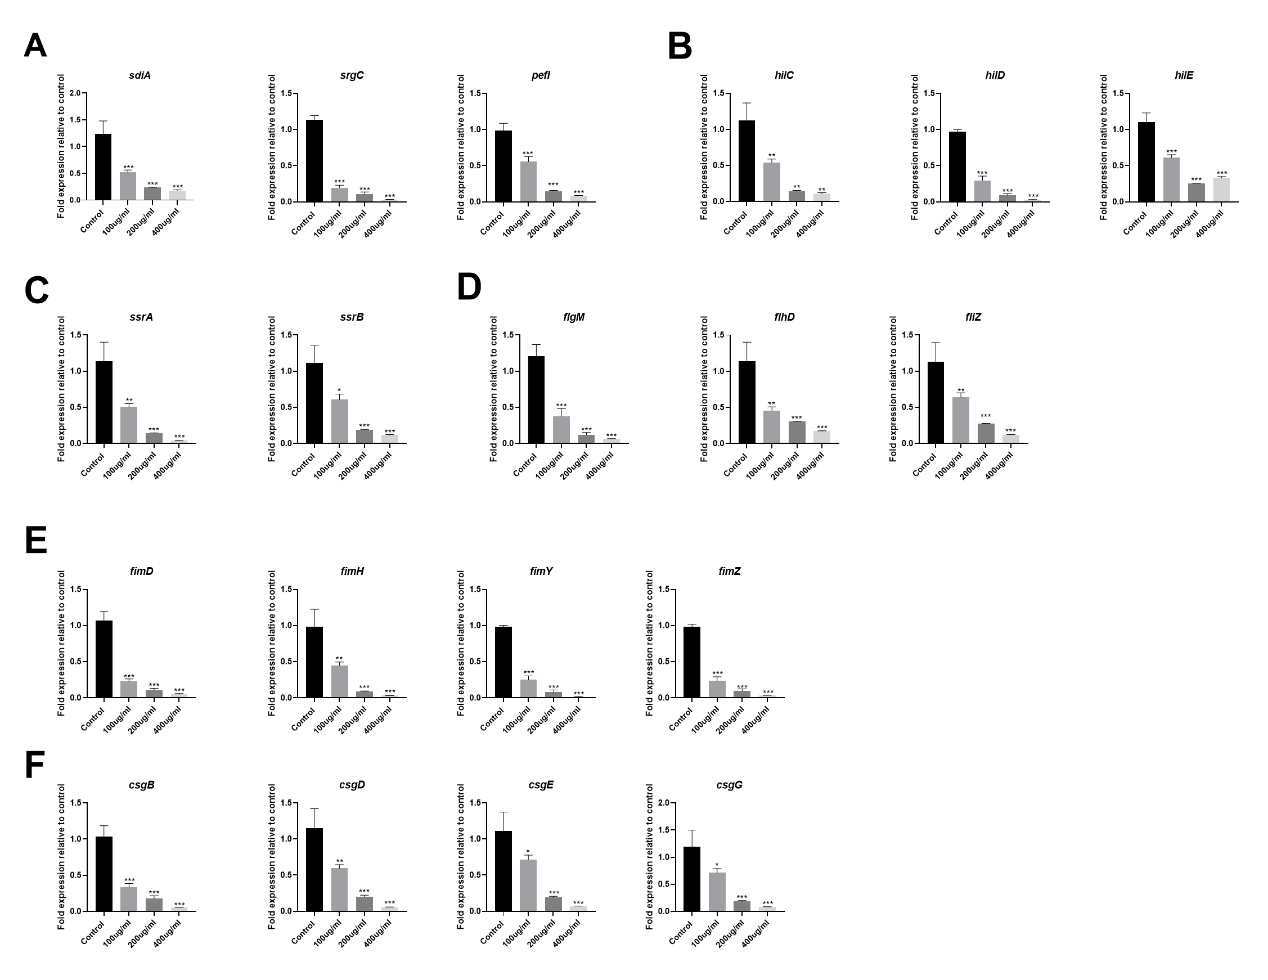

Supplement: Supplementary file 1 [file Table1.docx]
